# Supplementary material
Source: PubMed Central journal article supplement (PMC5460712)
Supplement: CJN.10941016SupplementaryData.pdf [file CJN.10941016SupplementaryData.pdf]

Supplemental material is neither peer-reviewed nor thoroughly edited by CJASN. The authors alone are responsible for the accuracy and presentation of the material.

Supplemental material

Supplementary Table 1. Nomogram for calcium carbonate dosing in the intensive arm

| <b>Serum P (mmol/L)</b> | <b>CaCO<sub>3</sub> 1250 mg tablets (500 mg elemental calcium/tablet)</b>       | <b>CaCO<sub>3</sub> 750 mg chewable tablets (300 mg elemental calcium/tablet)</b> |
|-------------------------|---------------------------------------------------------------------------------|-----------------------------------------------------------------------------------|
| < 0.75                  | Take 1 less tablet with each meal (i.e., reduce by up to 3 tablets per day)     | Take 1 less tablet with each meal (i.e., reduce by up to 3 tablets per day)       |
| <b>0.75-1.50</b>        | <b>At target, no change</b>                                                     | <b>At target, no change</b>                                                       |
| 1.51-2.00               | Take 3 additional tablets daily, 1 with each meal to a maximum of 6 tablets/day | Take 3 additional tablets daily, 1 with each meal to a maximum of 10 tablets/day  |
| > 2.00                  | Take 6 additional tablets daily, 2 with each meal to a maximum of 6 tablets/day | Take 6 additional tablets daily, 2 with each meal to a maximum of 10 tablets/day  |

Supplementary Table 2. Nomogram for calcium carbonate dosing in the liberalized arm

| <b>Serum P (mmol/L)</b> | <b>CaCO<sub>3</sub> 1250 mg tablets (500 mg elemental calcium/tablet)</b>        | <b>CaCO<sub>3</sub> 750 mg chewable tablets (300 mg elemental calcium/tablet)</b> |
|-------------------------|----------------------------------------------------------------------------------|-----------------------------------------------------------------------------------|
| ≤2.00                   | Take 3 fewer tablets daily (ie, 1 less tablet with each meal)                    | Take 3 fewer tablets daily (ie, 1 less tablet with each meal)                     |
| <b>2.01-2.50</b>        | <b>At target, no change</b>                                                      | <b>At target, no change</b>                                                       |
| 2.51-3.00               | Add 1 tablet to largest meal of the day to a maximum of 6 tablets/day            | Add 1 tablet to largest meal of the day, to a maximum of 10 tablets/day           |
| > 3.00                  | Take 3 additional tablets daily, 1 with each meal, to a maximum of 6 tablets/day | Take 3 additional tablets daily, 1 with each meal, to a maximum of 10 tablets/day |

\* Patients in arm who are receiving sevelamer or lanthanum will continue to receive these drugs with no dose adjustment during the follow-up period.
